# Supplementary material
Source: MDPI journal article supplement (https://www.mdpi.com/2673-9992/14/1/85)
Supplement: s1 [file s1]

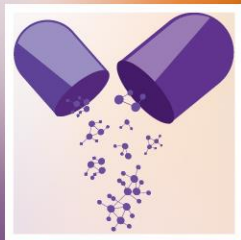

# The 8th International Electronic Conference on Medicinal Chemistry (ECMC 2022)

01-30 NOVEMBER 2022 | ONLINE

**Cu(PPh<sub>3</sub>)<sub>3</sub>Br-CATALYZED SYNTHESIS OF NEW PARACETAMOL-1,2,3-TRIAZOLE MOLECULAR HYBRIDS FROM EXPIRED COMMERCIAL TABLETS AND THEIR *IN-SILICO* ASSESSMENT TO STUDY THEIR PHARMACOLOGICAL PROPERTIES**

Chaired by **DR. ALFREDO BERZAL-HERRANZ**;  
Co-Chaired by **PROF. DR. MARIA EMÍLIA SOUSA**

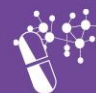

pharmaceuticals

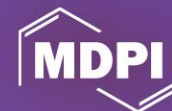

**Daniela Calderón Lamus<sup>1</sup>, Carlos E. Puerto Galvis<sup>1</sup> and Vladimir V. Kouznetsov<sup>1,\*</sup>**

<sup>1</sup> Laboratorio de Química Orgánica y Biomolecular, Escuela de Química, Universidad Industrial de Santander

\* Corresponding author: [kouznet@uis.edu.co](mailto:kouznet@uis.edu.co)

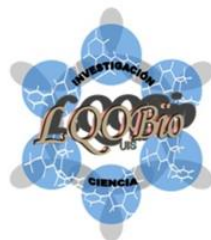

Universidad  
Industrial de  
Santander

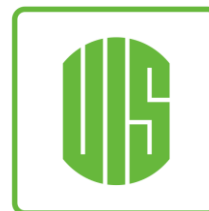

# Cu(PPh<sub>3</sub>)<sub>3</sub>Br-CATALYZED SYNTHESIS OF NEW PARACETAMOL-1,2,3-TRIAZOLE MOLECULAR HYBRIDS FROM EXPIRED COMMERCIAL TABLETS AND THEIR *IN-SILICO* ASSESSMENT TO STUDY THEIR PHARMACOLOGICAL PROPERTIES

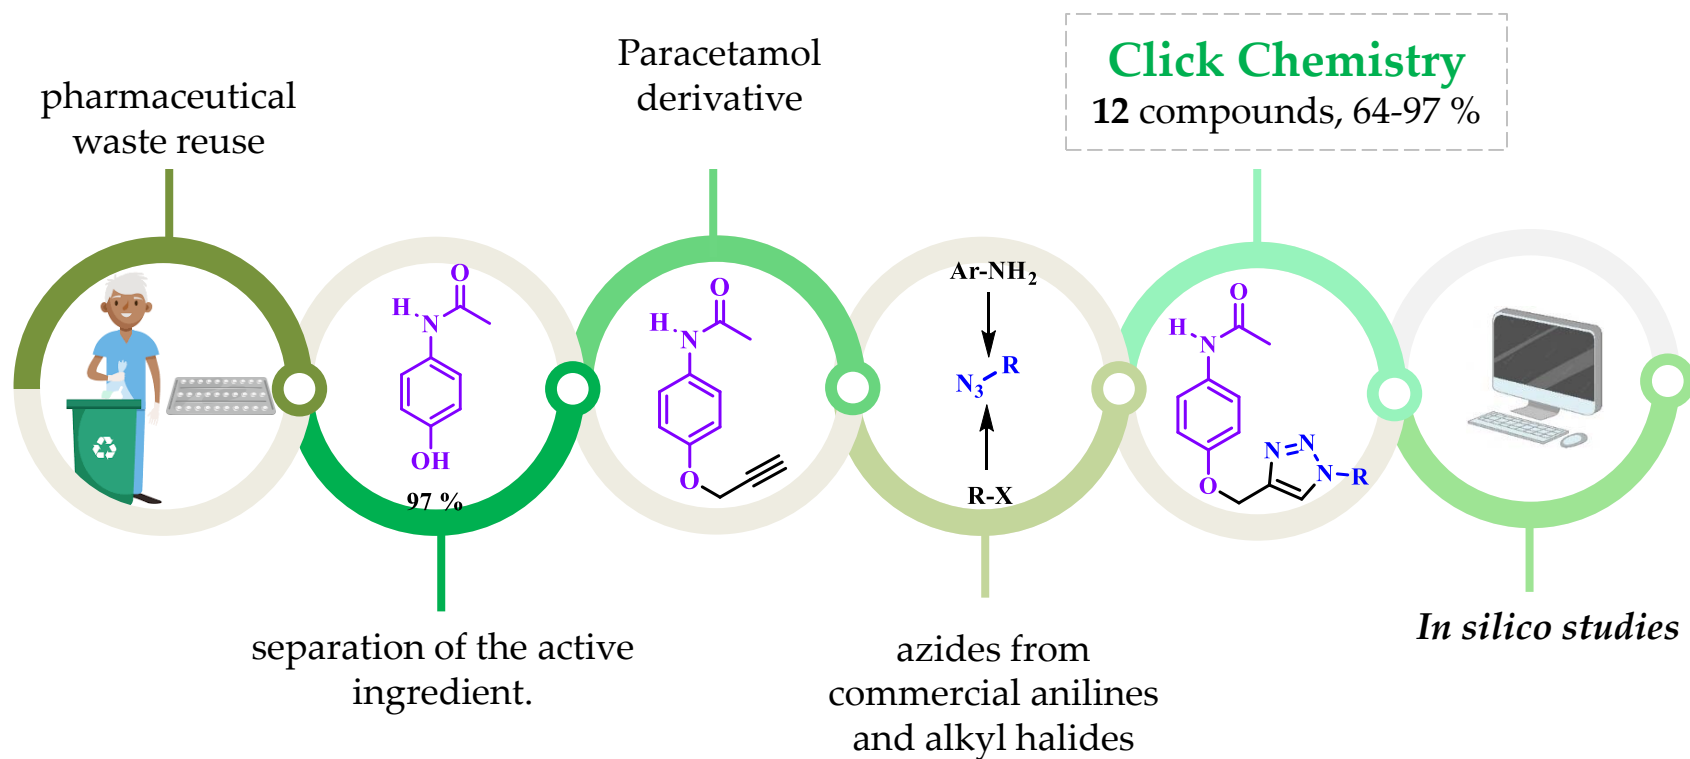

ECMC  
2022

The 8th International Electronic  
Conference on Medicinal Chemistry  
01-30 NOVEMBER 2022 | ONLINE

## Abstract

The 1,2,3-Triazole ring has remarkable importance in medicinal chemistry due to its unique biological properties such as metabolic stability and ability to form hydrogen bonds. Several biological activities had been reported for this structural nucleus, while paracetamol (acetaminophen, *N*-(4-hydroxyphenyl)acetamide) is one of the most popular and widely used drugs for the treatment of pain and fever. Applying a molecular hybridization strategy, numerous 1,2,3-triazole-based compounds have been designed, prepared, and studied for pharmacological applications in multiple laboratories around the world. Considering this context, we used expired acetaminophen pills as starting material for generating new series of functionalized paracetamol-1,2,3-triazole hybrids. Their synthesis consists of  $\text{Cu}(\text{PPh}_3)_3\text{Br}$ -catalyzed 1,3-dipolar cycloaddition reaction of *O*-propargyl-acetaminophen and several azides prepared from commercially available anilines, following the protocol reported by Filimonov et al. Performing click chemistry and considering green chemistry principles, interesting paracetamol-1,2,3-triazole derivatives were easily prepared in 53-93 % yields. Obtained hybrids were subjected to *In-Silico* analysis (Molinspiration, OSIRIS, and DRUDIT), evaluating some physicochemical properties and toxicity risks. According to the predicted biological properties, most of the prepared hybrid molecules exhibit adequate parameters as potential pharmacological agents, presenting high inhibitory activity, low risks of toxicity, and good affinity for various biological targets. This work highlights the recycling of expired drugs and the accessibility to new paracetamol-based compounds under green mild reaction conditions ( $\text{H}_2\text{O}/\text{tert-BuOH}$  mixture, rt) and low catalytic loads (1 mol%  $\text{Cu}(\text{PPh}_3)_3\text{Br}$ ).

**Keywords:** 1,3-dipolar cycloaddition; *In-Silico* studies; Paracetamol-1,2,3-triazole hybrids

# Introduction

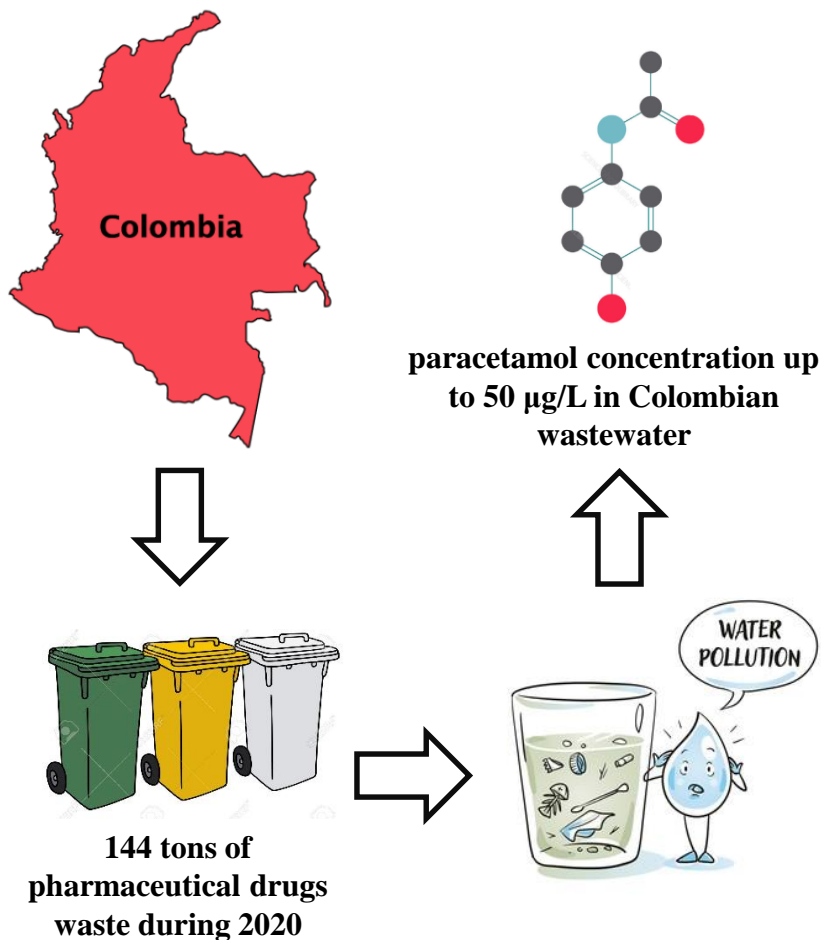

## A molecular hybridization strategy

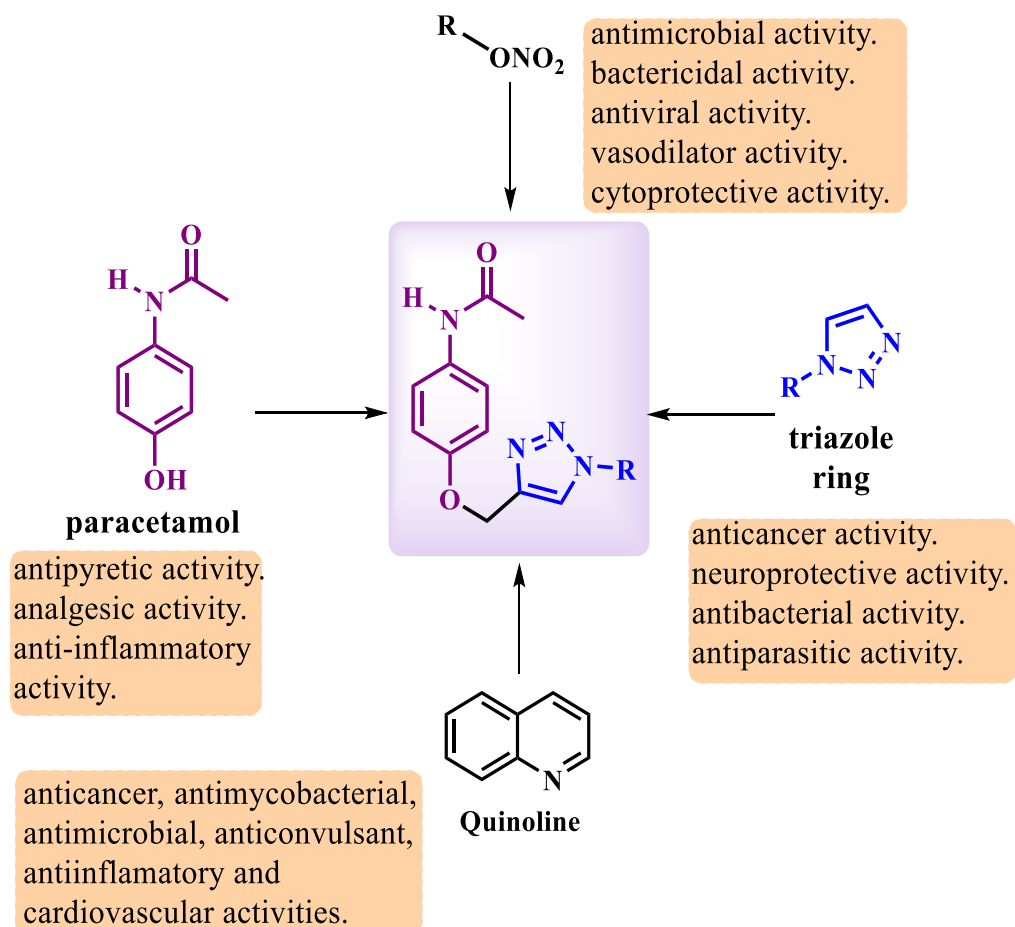

# Methodology

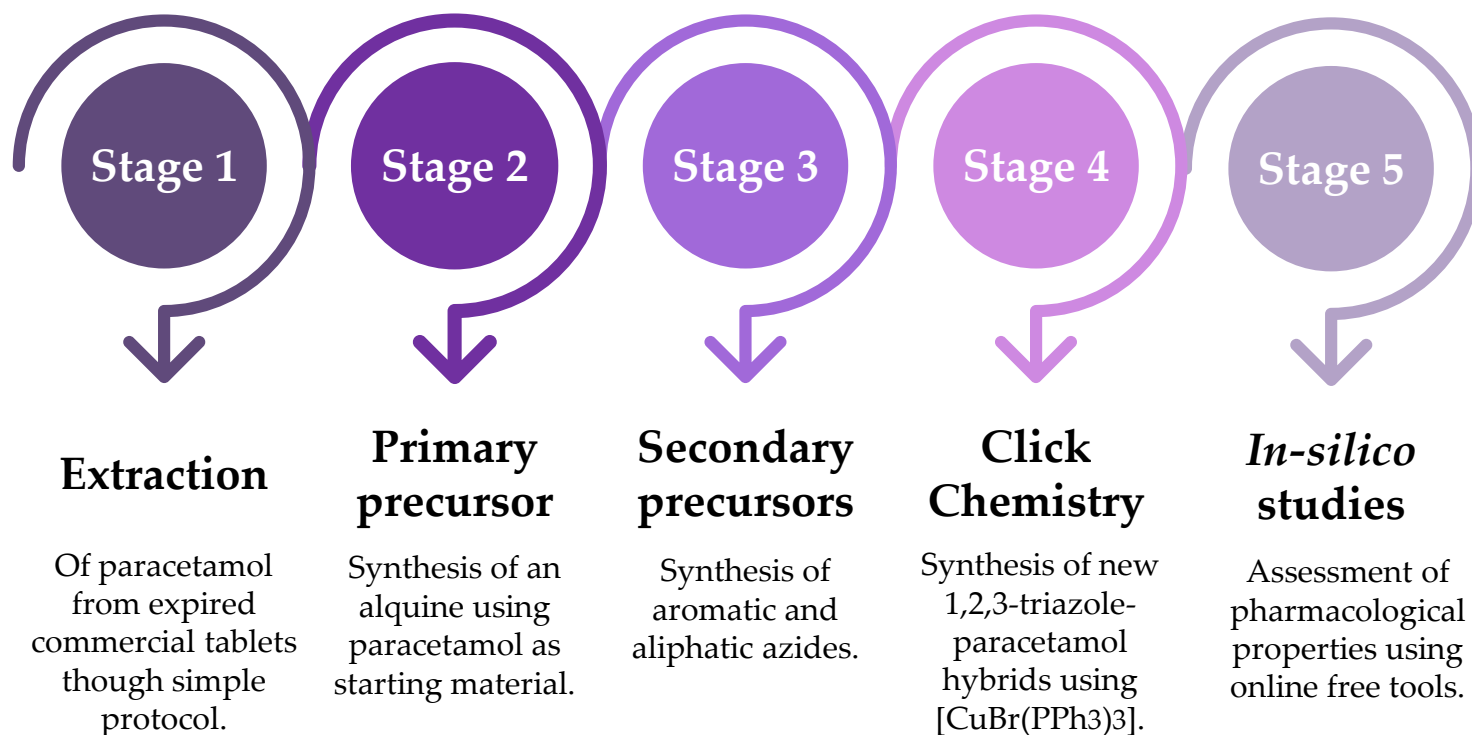

## Obtaining paracetamol from expired commercial tablets

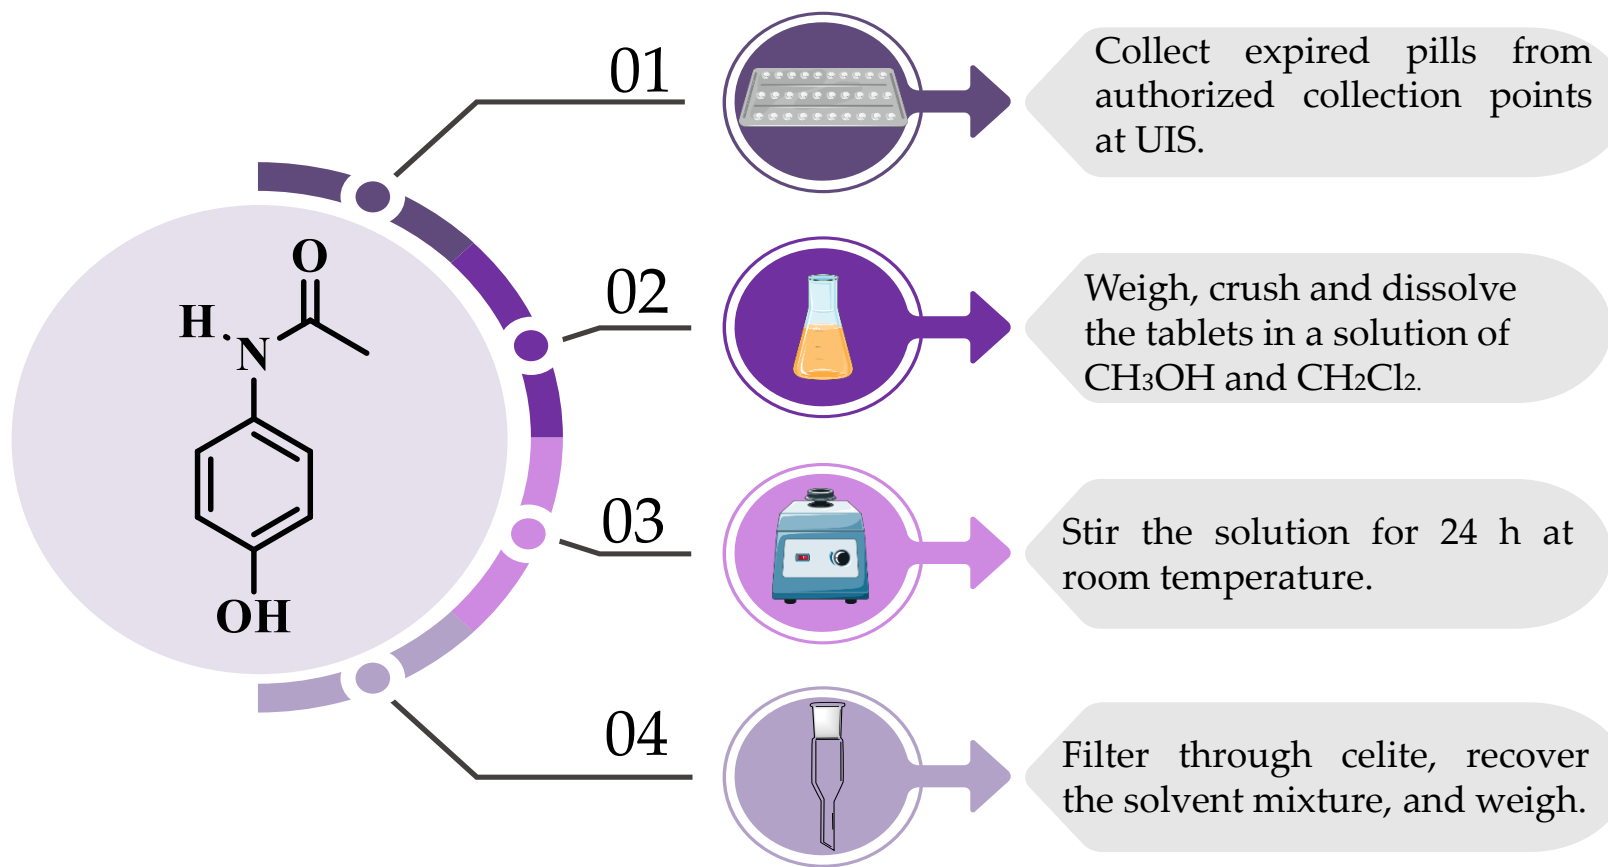

## Synthesis of primary precursor

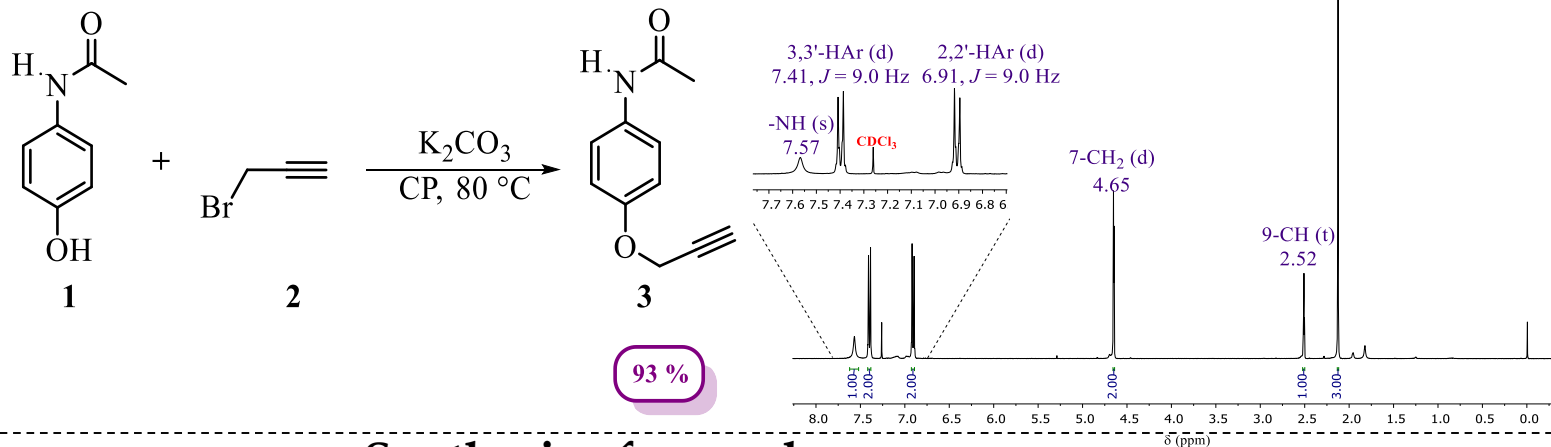

## Synthesis of secondary precursors

### Route 1: diazonium salts

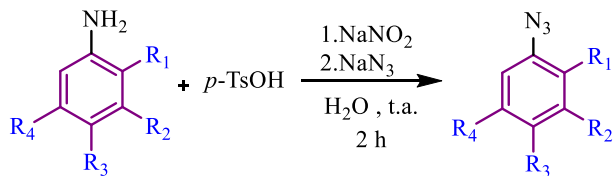

**11a**  
97%

|            | $R_1$  | $R_2$   | $R_3$   | $R_4$  | %  |
|------------|--------|---------|---------|--------|----|
| <b>4a</b>  | H      | H       | COOH    | H      | 86 |
| <b>5a</b>  | H      | H       | Cl      | H      | 60 |
| <b>6a</b>  | H      | H       | I       | H      | 64 |
| <b>7a</b>  | H      | H       | OH      | H      | 85 |
| <b>8a</b>  | Br     | H       | H       | H      | 86 |
| <b>9a</b>  | $NO_2$ | H       | $CH_3$  | $CH_3$ | 93 |
| <b>10a</b> | H      | $OCH_3$ | $OCH_3$ | H      | 97 |

### Route 2: bimolecular substitution

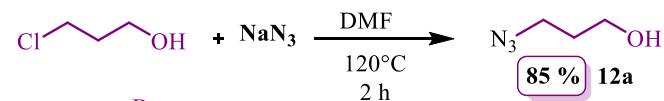

85% **12a**

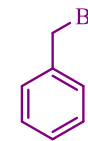

73% **13a**

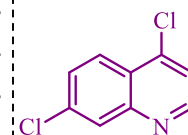

96% **14a**

ECMC  
2022

The 8th International Electronic  
Conference on Medicinal Chemistry  
01-30 NOVEMBER 2022 | ONLINE

# Synthesis of novel paracetamol-1,2,3-triazole hybrids

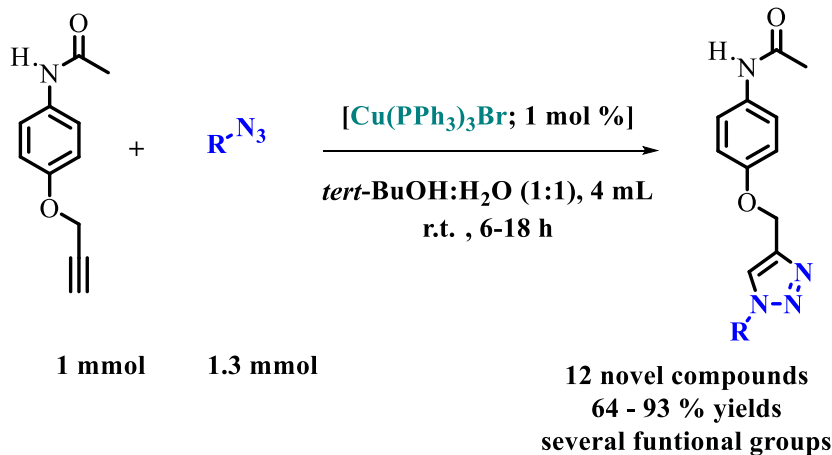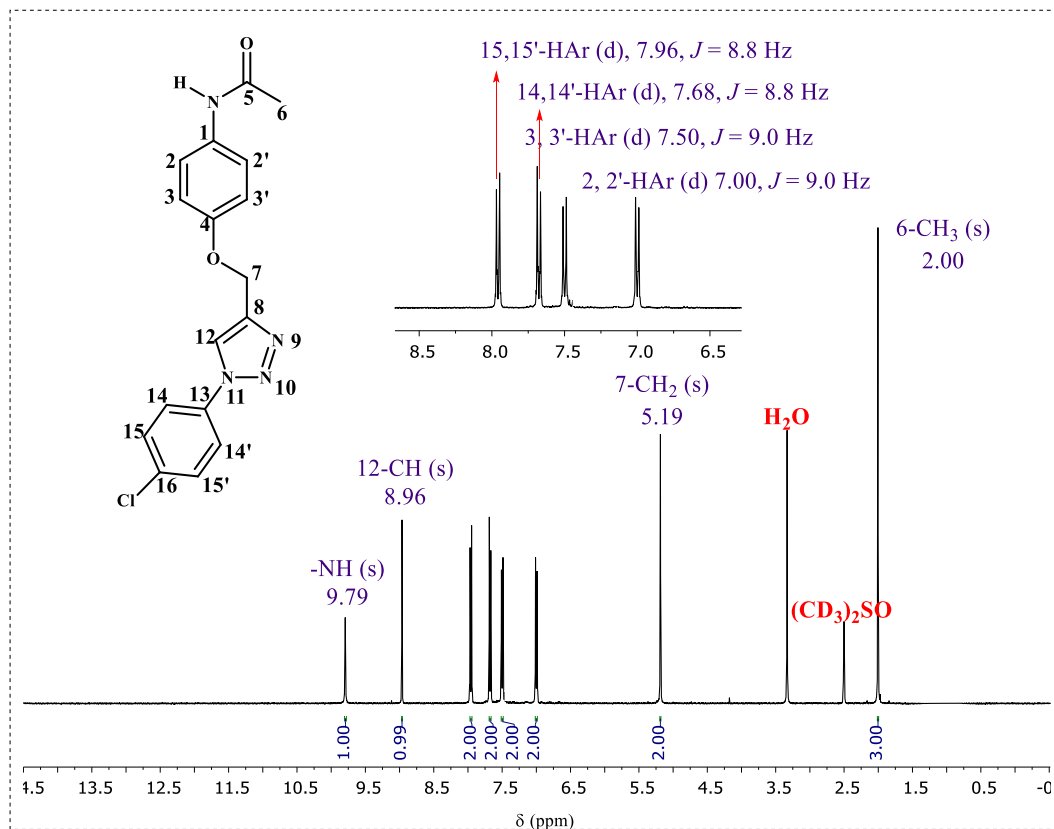

- ✓ Optimization of reaction conditions, evaluating catalyst and catalytic load.
- ✓ Structural characterization using IR and NMR analysis.

ECMC  
2022

The 8th International Electronic  
Conference on Medicinal Chemistry  
01-30 NOVEMBER 2022 | ONLINE



# Results and discussion

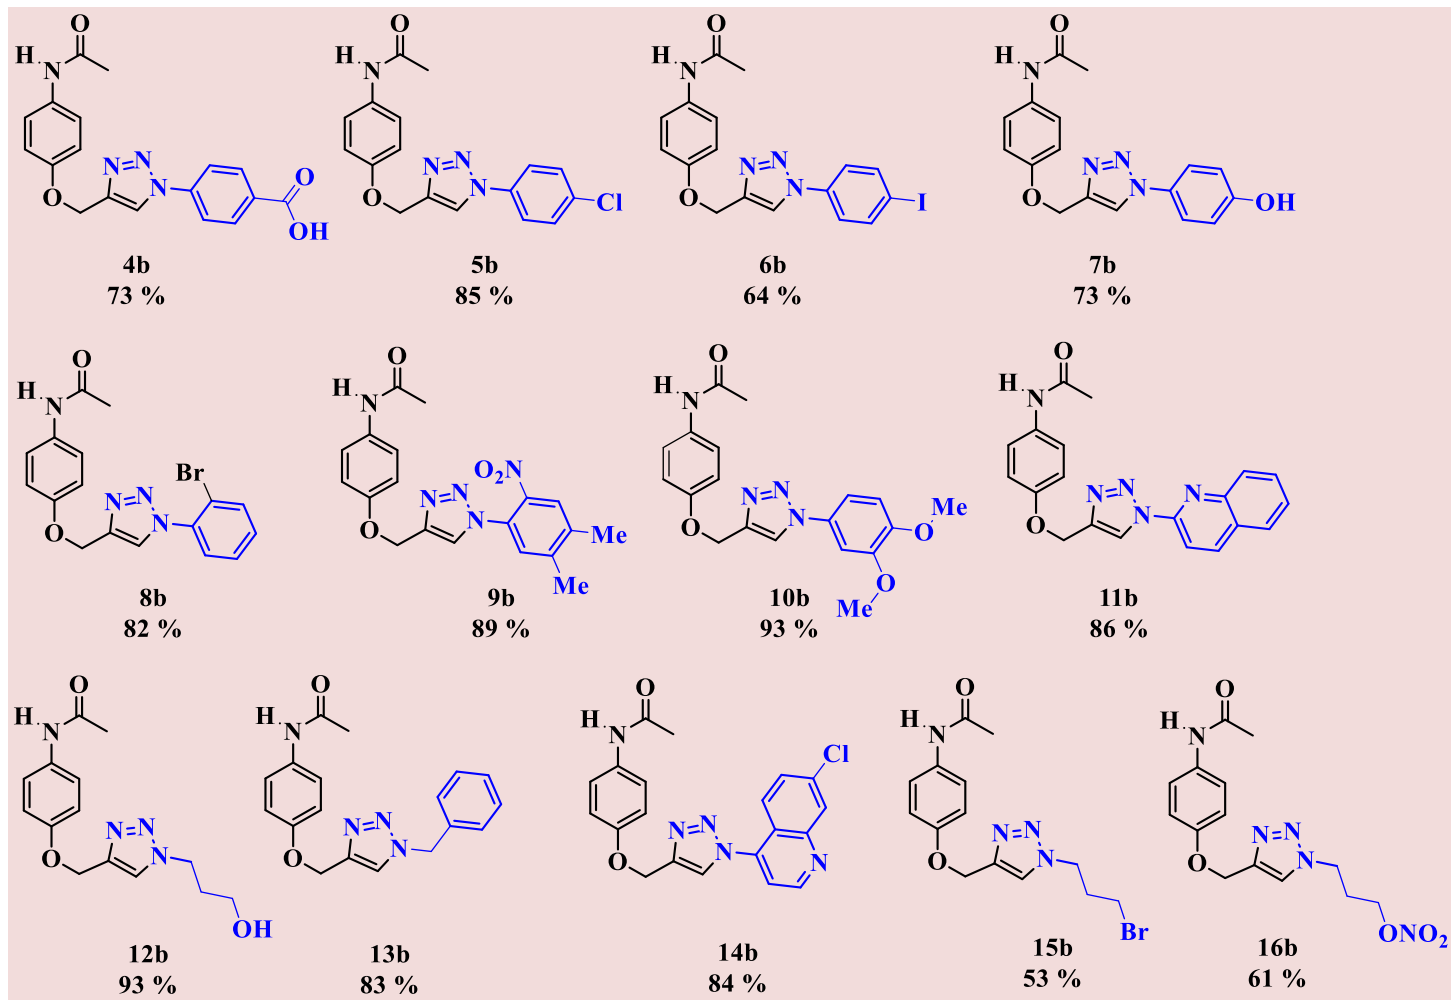

# Physicochemical properties using Molinspiration

| Comp. | miLogP | MW     | nON | nOHNH | N rot. bonds | TPSA   | N atoms | volume |
|-------|--------|--------|-----|-------|--------------|--------|---------|--------|
| 4b    | 2.15   | 352.35 | 8   | 2     | 6            | 106.35 | 26      | 304.65 |
| 5b    | 2.92   | 342.79 | 6   | 1     | 5            | 69.05  | 24      | 291.18 |
| 6b    | 3.32   | 434.24 | 6   | 1     | 5            | 69.05  | 24      | 301.64 |
| 7b    | 1.76   | 324.34 | 7   | 2     | 5            | 89.28  | 24      | 285.67 |
| 8b    | 3.21   | 387.24 | 6   | 1     | 5            | 69.05  | 24      | 295.53 |
| 9b    | 3.27   | 381.39 | 9   | 1     | 7            | 107.72 | 28      | 334.58 |
| 10b   | 2.10   | 368.74 | 8   | 1     | 7            | 87.52  | 27      | 328.74 |
| 11b   | 3.01   | 359.39 | 7   | 1     | 5            | 81.94  | 27      | 317.48 |
| 12b   | 0.60   | 290.32 | 7   | 2     | 7            | 89.28  | 21      | 264.66 |
| 13b   | 2.56   | 322.37 | 6   | 1     | 6            | 69.05  | 24      | 294.45 |
| 14b   | 3.55   | 393.83 | 7   | 1     | 5            | 81.94  | 28      | 331.02 |
| 15b   | 1.97   | 353.22 | 6   | 1     | 7            | 69.05  | 21      | 274.53 |
| 16b   | 1.86   | 335.32 | 10  | 1     | 9            | 124.11 | 24      | 288.96 |

\*No compound has violations of RO5

ECMC  
2022

The 8th International Electronic  
Conference on Medicinal Chemistry  
01-30 NOVEMBER 2022 | ONLINE

## Bioactivity scores using Molinspiration

| compound | GPCR ligand | Ion channel modulator | Kinase inhibitor | Nuclear receptor ligand | Proteasa inhibitor | Enzyme inhibitor |
|----------|-------------|-----------------------|------------------|-------------------------|--------------------|------------------|
| 4b       | 0.04        | -0.11                 | -0.09            | -0.13                   | -0.12              | 0.06             |
| 5b       | 0.02        | -0.11                 | -0.07            | -0.32                   | -0.21              | -0.04            |
| 6b       | 0.03        | -0.11                 | -0.04            | -0.27                   | -0.24              | -0.06            |
| 7b       | 0.07        | -0.05                 | 0.00             | -0.17                   | -0.14              | 0.06             |
| 8b       | 0.06        | -0.24                 | -0.17            | -0.48                   | -0.35              | -0.03            |
| 9b       | -0.09       | -0.29                 | -0.14            | -0.34                   | -0.26              | -0.06            |
| 10b      | -0.01       | -0.18                 | -0.06            | -0.33                   | -0.23              | -0.05            |
| 11b      | <b>0.12</b> | -0.14                 | <b>0.11</b>      | -0.34                   | -0.24              | <b>0.18</b>      |
| 12b      | -0.06       | -0.28                 | -0.02            | -0.41                   | -0.15              | 0.08             |
| 13b      | -0.01       | -0.16                 | -0.08            | -0.36                   | -0.14              | -0.01            |
| 14b      | <b>0.17</b> | -0.13                 | 0.03             | -0.40                   | -0.21              | 0.09             |
| 15b      | -0.12       | -0.35                 | -0.15            | -0.50                   | -0.30              | 0.09             |
| 16b      | <b>0.13</b> | -0.40                 | -0.16            | -0.45                   | -0.20              | <b>0.27</b>      |

\* Parameters marked in bold indicated a strong interaction between the molecule and the biological target.

# Toxicity risks using OSIRIS property explorer

 No risk     Moderate risk     High risk

| compound | Mutagenic                                                                           | Tumorigenic                                                                         | Irritant                                                                            | Reproductive effective                                                                | <i>druglikeness</i> | <i>drugscore</i> |
|----------|-------------------------------------------------------------------------------------|-------------------------------------------------------------------------------------|-------------------------------------------------------------------------------------|---------------------------------------------------------------------------------------|---------------------|------------------|
| 4b       |    |    |    |    | -0.52               | 0.59             |
| 5b       |    |    |    |    | 1.06                | <b>0.70</b>      |
| 6b       |    |    |    |    | 0.65                | 0.59             |
| 7b       |    |    |    |    | 0.46                | <b>0.72</b>      |
| 8b       |    |    |    |    | -2.76               | -0.4             |
| 9b       |    |    |    |    | -0.66               | 0.17             |
| 10b      |    |    |    |    | -1.82               | 0.48             |
| 11b      |    |    |    |    | 0.37                | 0.64             |
| 12b      |    |    |    |    | -0.75               | 0.62             |
| 13b      |    |    |    |    | 1.72                | <b>0.78</b>      |
| 14b      |   |   |   |   | 1.32                | 0.37             |
| 15b      |  |  |  |  | -8.16               | 0.12             |
| 16b      |  |  |  |  | -0.71               | 0.59             |

# What is next?

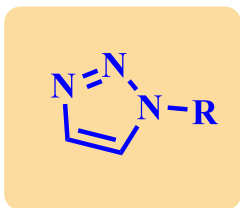

Several reports have shown the wide range of biological properties of triazole ring, including antifungal, antibacterial and anticancer activity.

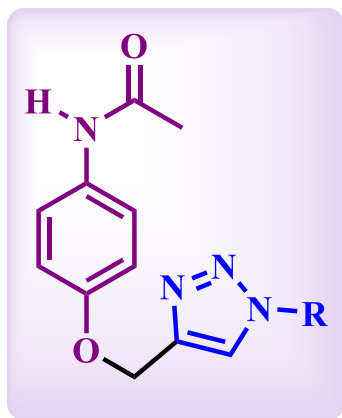

Given that our *in-silico* resulting data showed that some of the synthesized compounds can alter crucial proteins and enzymes for the normal functioning of prokaryotic and eukaryotic cells, we are currently doing *in vitro* bioassays to evaluate antibacterial and antitumor activity.

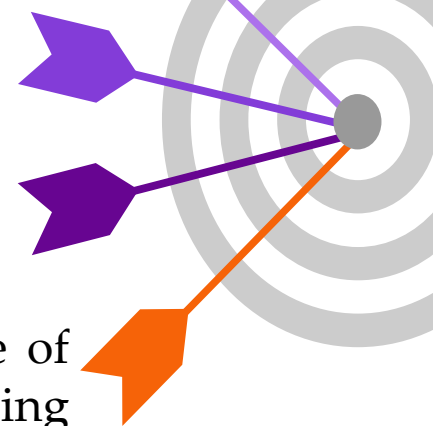

# Conclusions

- ✓ We achieved the extraction of paracetamol from expired commercial tablets recovered from drug collection points with an extraction efficiency of 97 %.
- ✓ Twelve new molecular hybrids containing acetaminophen and 1,2,3-triazole fragments were synthesized in 53-93 % yields and their structures were confirmed using IR and NMR.
- ✓ Overall, the synthetic protocol developed is considered a sustainable protocol since it involves several principles of green chemistry (reuse, effective catalysis, economy of atoms, alternative solvents, etc.).
- ✓ According to *in-silico* studies, most of the compounds do not present risks of toxicity and have a moderate affinity for some biological targets.
- ✓ Biological activity, such as antitumor and antibacterial activity of the obtained compounds are in progress and will be the subject of another report.

# Acknowledgments

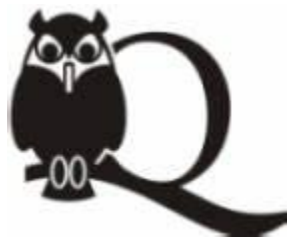

Universidad  
Industrial de  
Santander

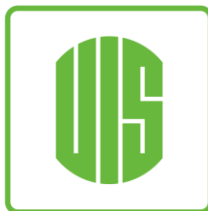

The authors thank UIS for financial support.

## Publications

This work was partially published at the Latin American Chemistry Congress (CLAQ 2020).

**ECMC**  
**2022**

**The 8th International Electronic  
Conference on Medicinal Chemistry**

01-30 NOVEMBER 2022 | ONLINE
